# Supplementary material
Source: ML conference proceedings conference paper supplement (https://openreview.net/forum?id=j4964wtJMz)

# $\tau$ vs $k'$ at final iteration of NFA-RFM

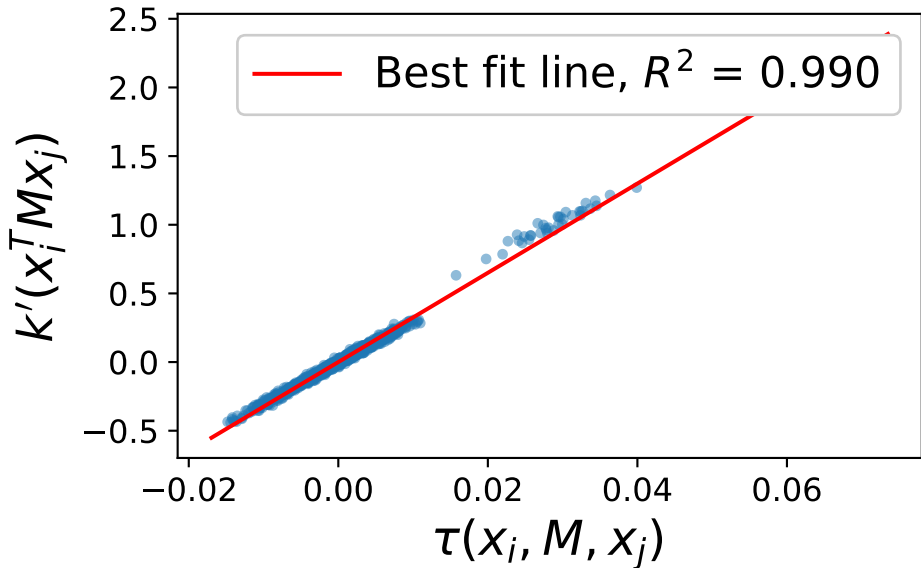

Supplement: supplementary_material [file tau_vs_kp_agop.pdf › fact_code/arithmetic/tau_vs_kp_agop.pdf]

# $\tau$ vs $k'$ at final iteration of FACT-RFM

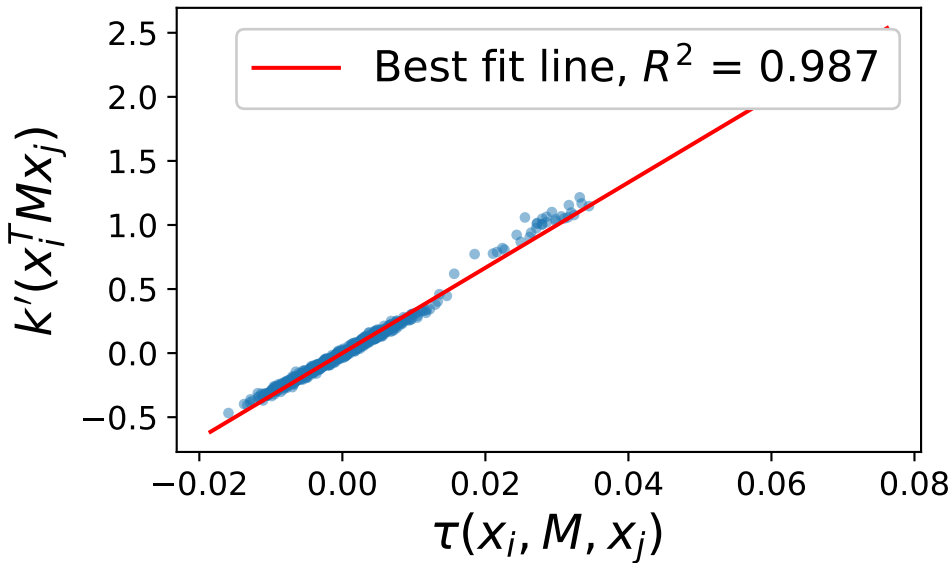

Supplement: supplementary_material [file tau_vs_kp_fact.pdf › fact_code/arithmetic/tau_vs_kp_fact.pdf]

$W^T W$

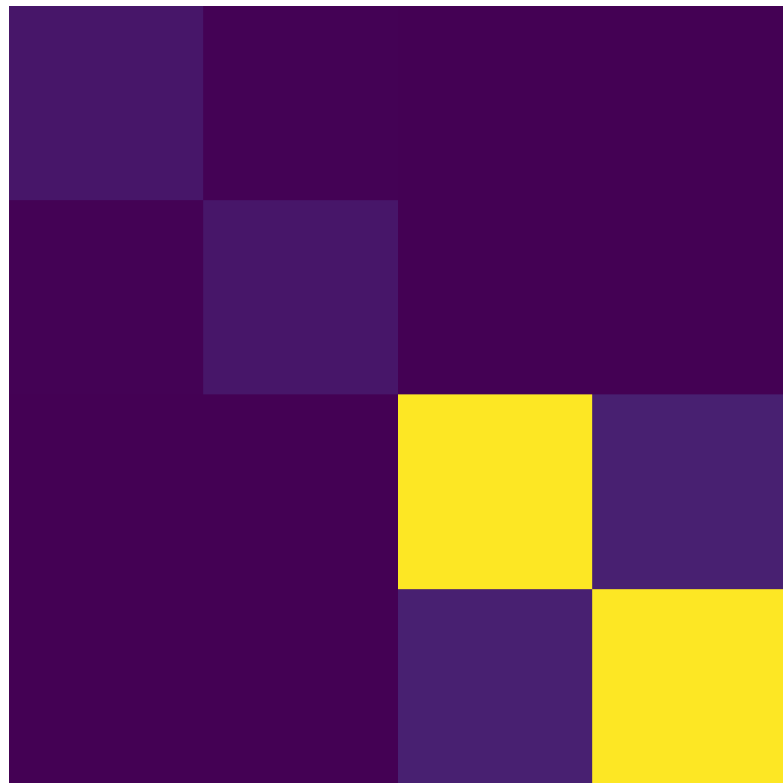

FACT

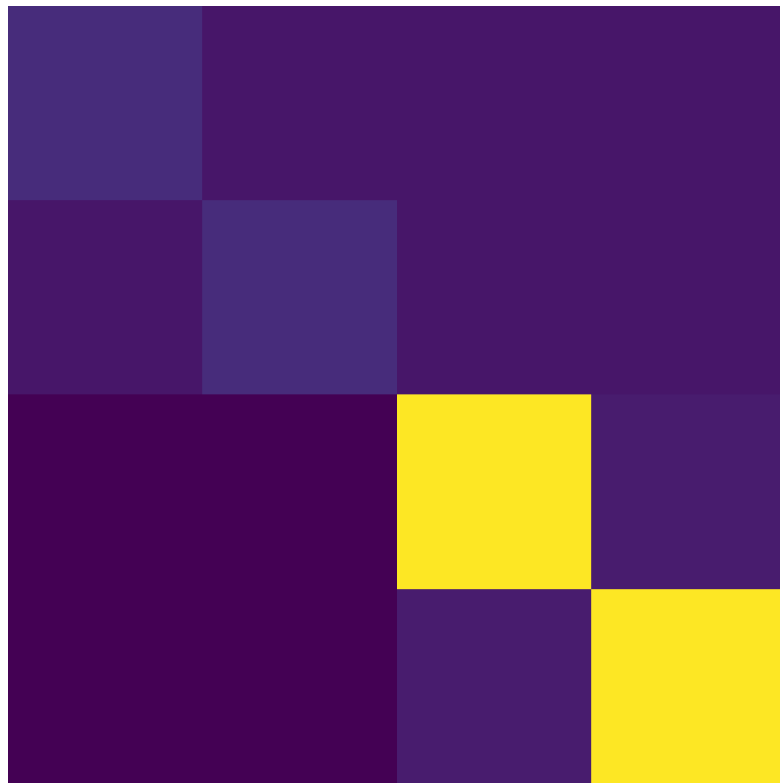

AGOP

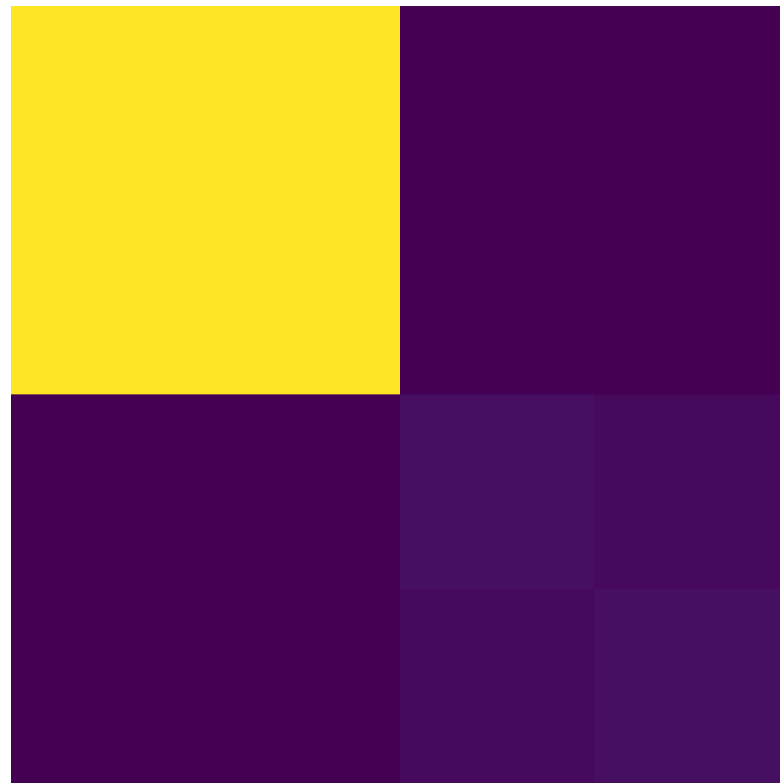

Supplement: supplementary_material [file comparison_plot.pdf › fact_code/fact_nfa_differ/comparison_plot.pdf]
